# Supplementary material
Source: PubMed Central journal article supplement (PMC6842059)
Supplement: NIHMS1052316-supplement-Supp_info.pdf [file NIHMS1052316-supplement-Supp_info.pdf]

## Supporting Information

### Contents

|                                                                                                 |        |
|-------------------------------------------------------------------------------------------------|--------|
| Copies of $^1\text{H}$ and $^{13}\text{C}$ NMR spectra of key intermediates and inhibitors..... | S2-S10 |
| Crystallographic data Table.....                                                                | S-11   |
| Virus and cell biology.....                                                                     | S-12   |

### Experimental Section

All reactions were carried out under an argon atmosphere in either flame or oven-dried (120 °C) glassware. All reagents and chemicals were purchased from commercial suppliers and used without further purification unless otherwise noted. Anhydrous solvents were obtained as follows: Dichloromethane from calcium hydride, diethyl ether and tetrahydrofuran from Na/Benzophenone, methanol and ethanol from activated magnesium under argon. All purification procedures were carried out with reagent grade solvents (purchased from VWR) in air. TLC analysis was conducted using glass-backed Thin-Layer Silica Gel Chromatography Plates (60 Å, 250 µm thickness, F-254 indicator). Column chromatography was performed using 230-400 mesh, 60 Å pore diameter silica gel.  $^1\text{H}$ ,  $^{13}\text{C}$  NMR spectra were recorded at room temperature on a Bruker ARX-400 and DRX-500. Chemical shifts ( $\delta$  values) are reported in parts per million, and are referenced to the deuterated residual solvent peak. NMR data is reported as:  $\delta$  value (chemical shift, J-value (Hz), integration, where s = singlet, d = doublet, t = triplet, q = quartet, brs = broad singlet). LRMS and HRMS spectra were recorded at the Purdue University Department of Chemistry Mass Spectrometry Center.



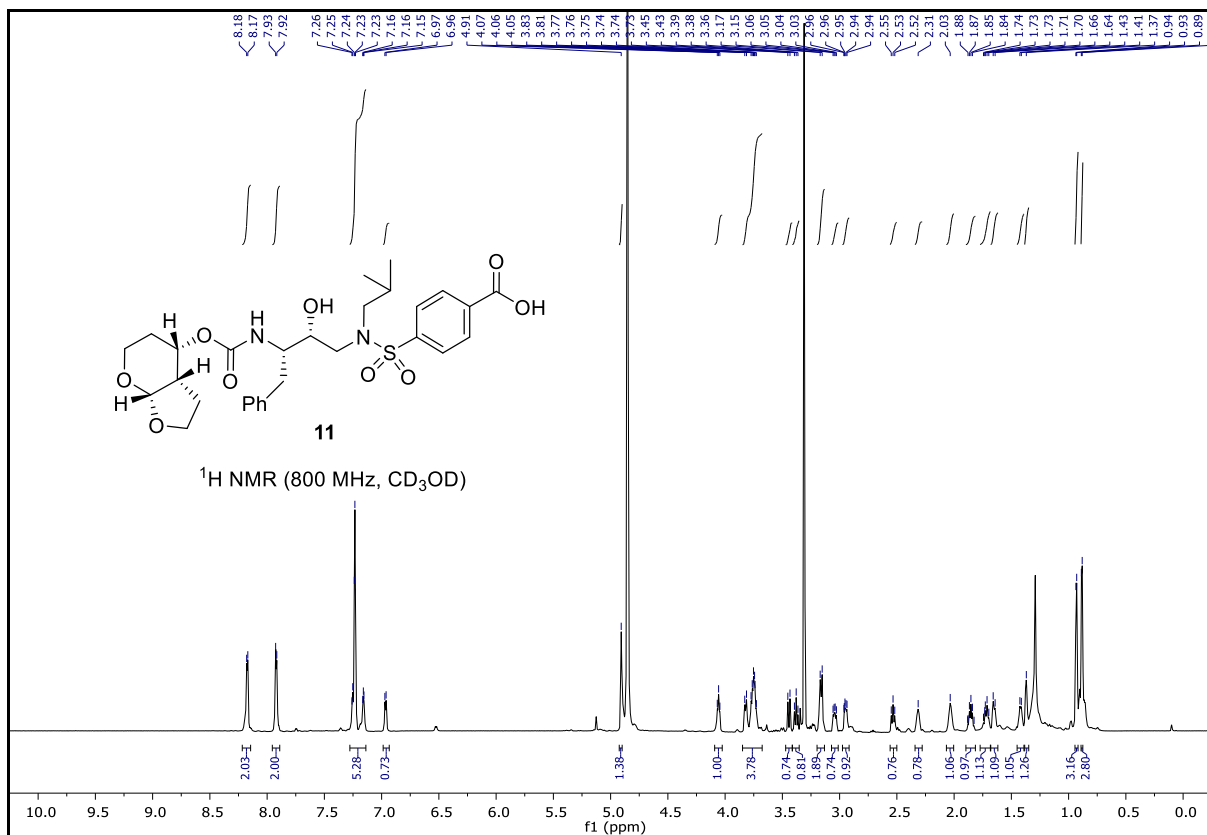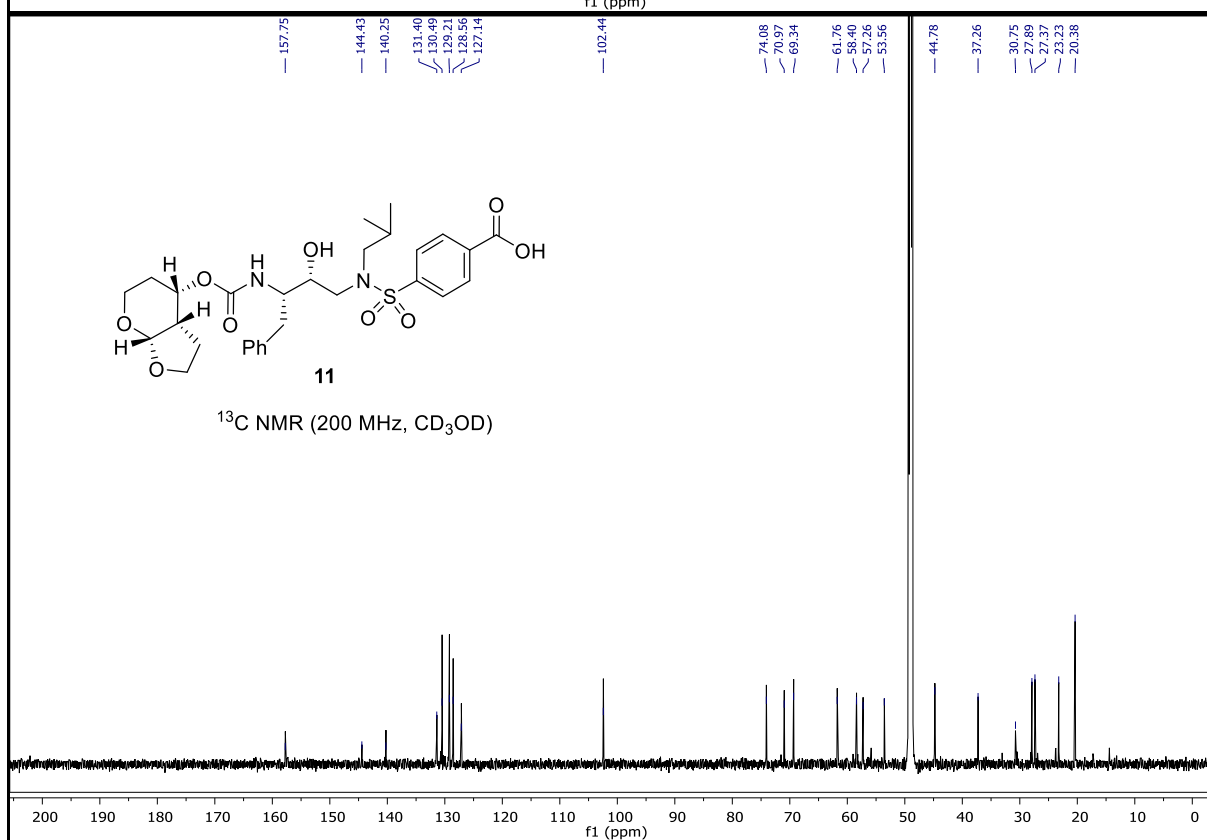

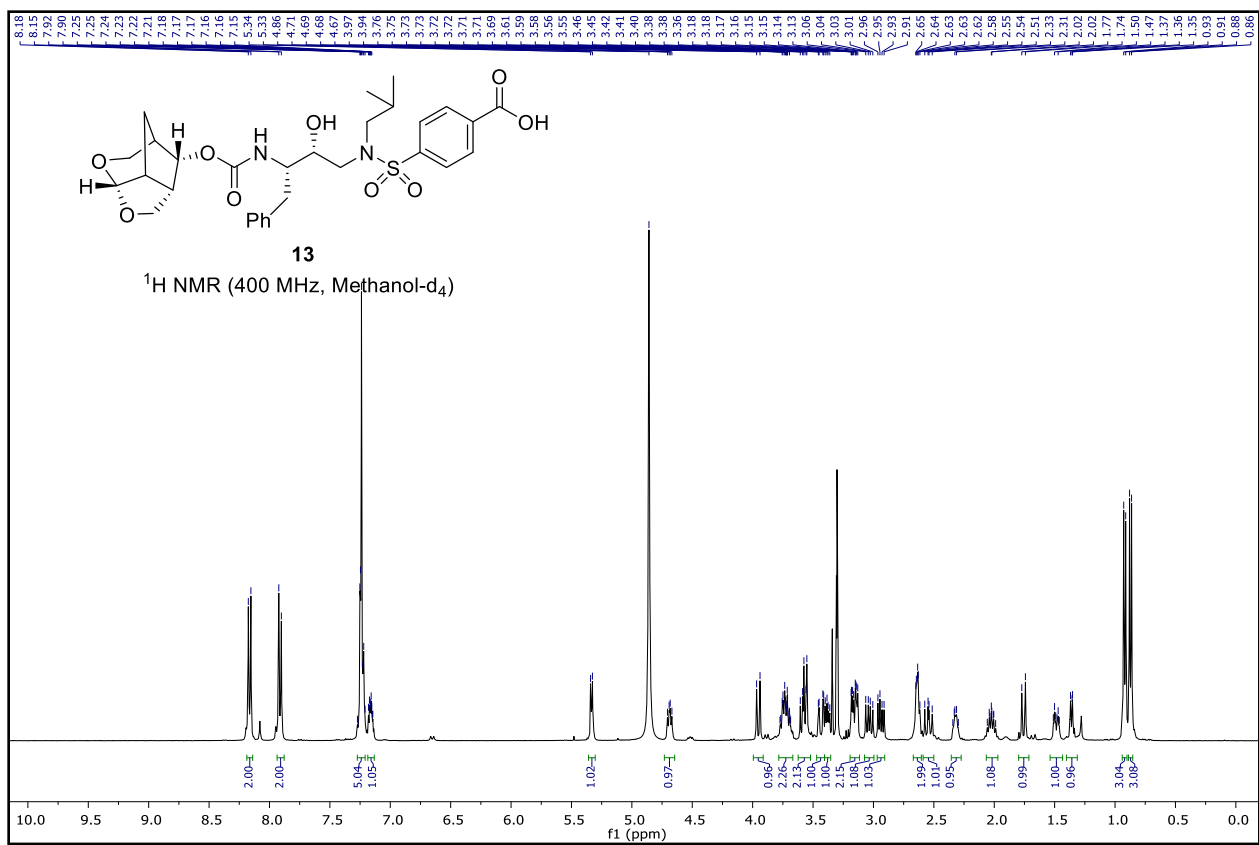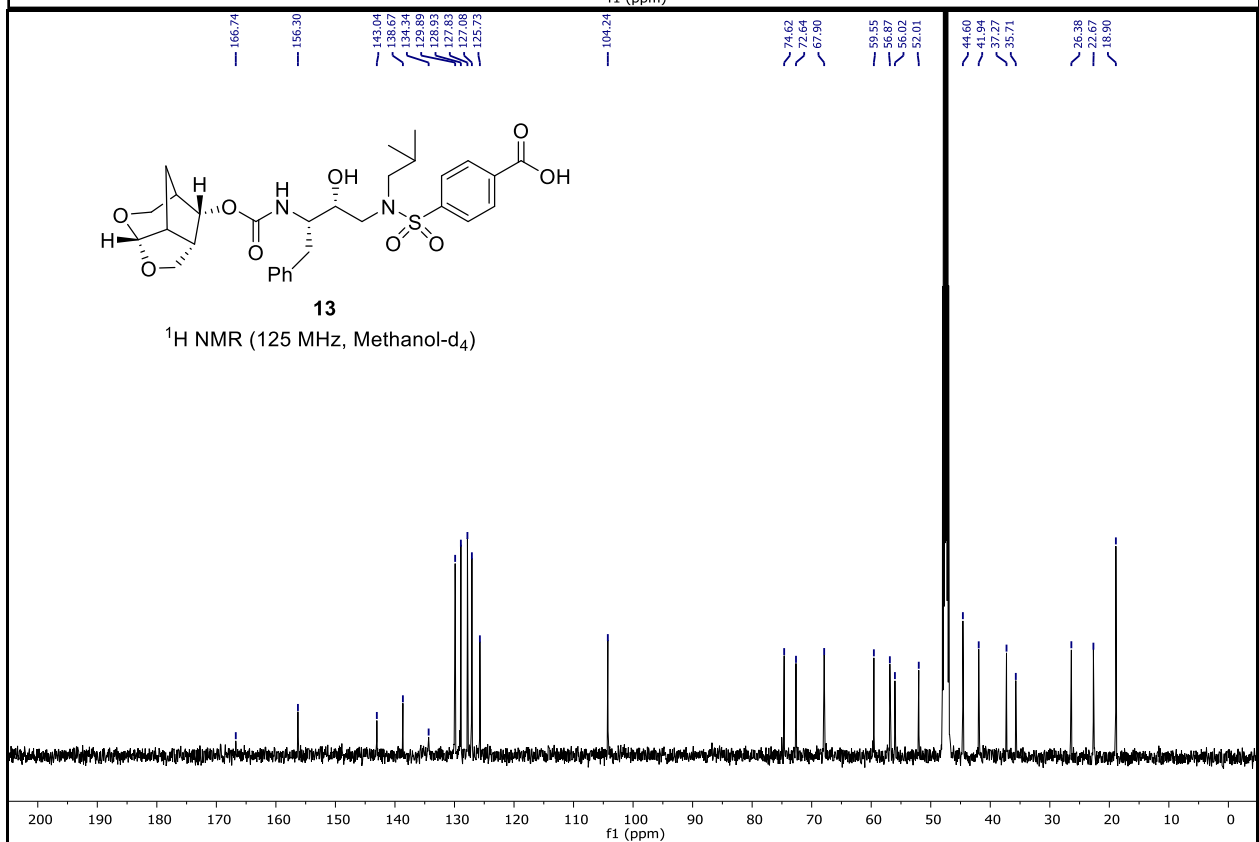

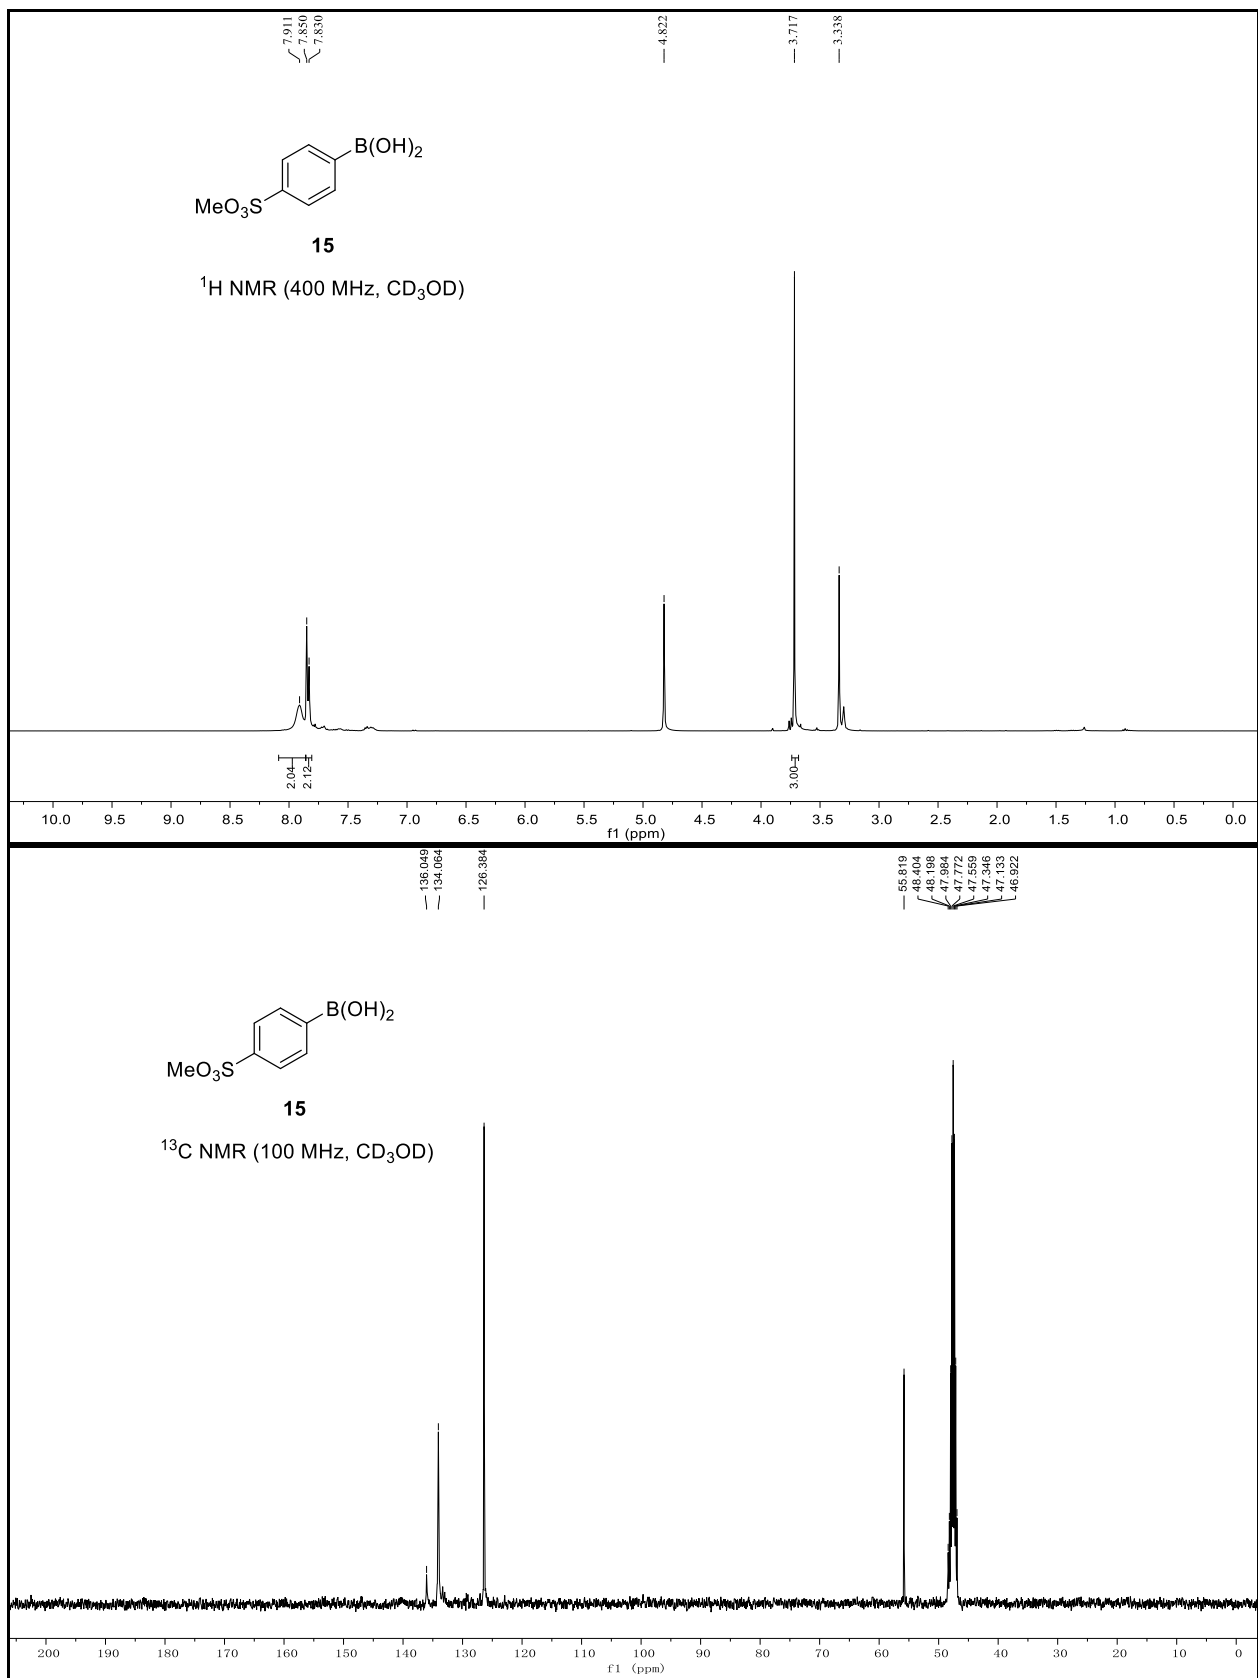

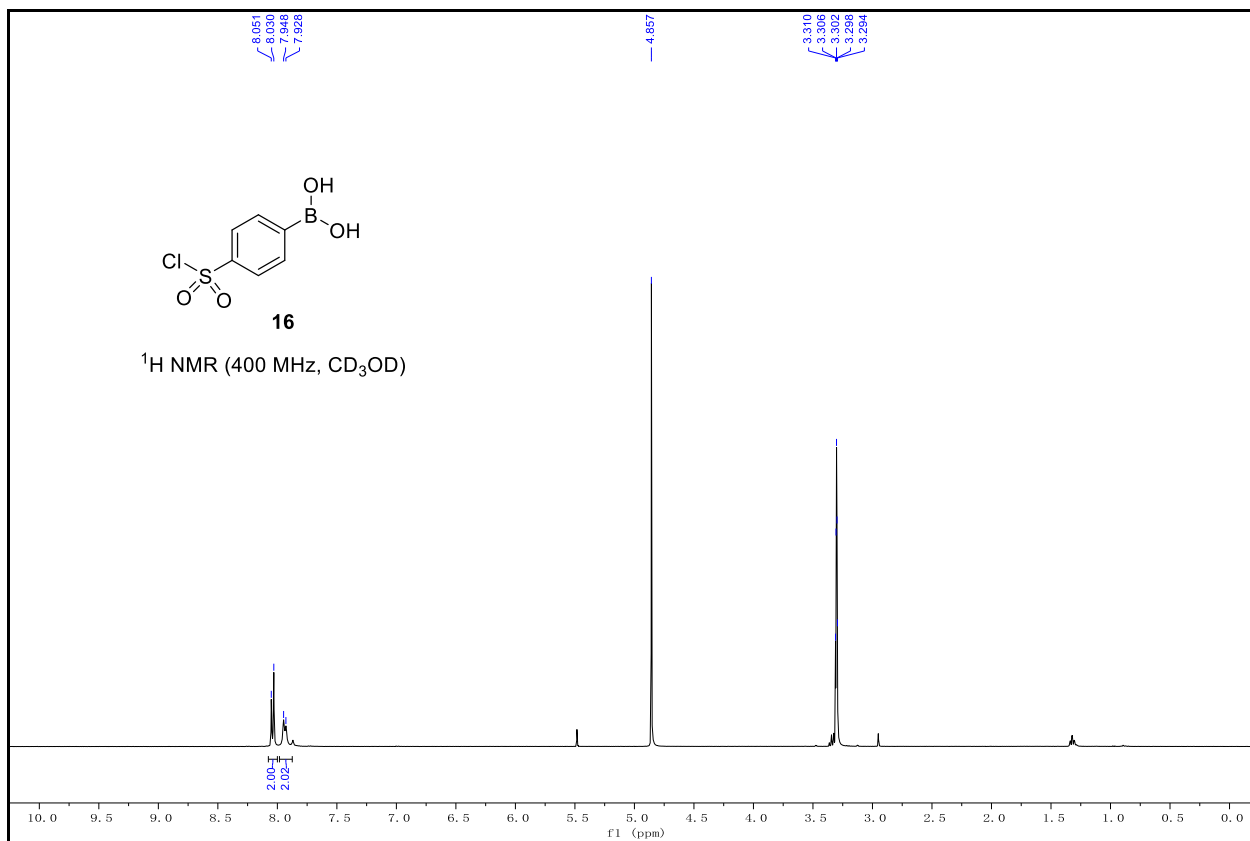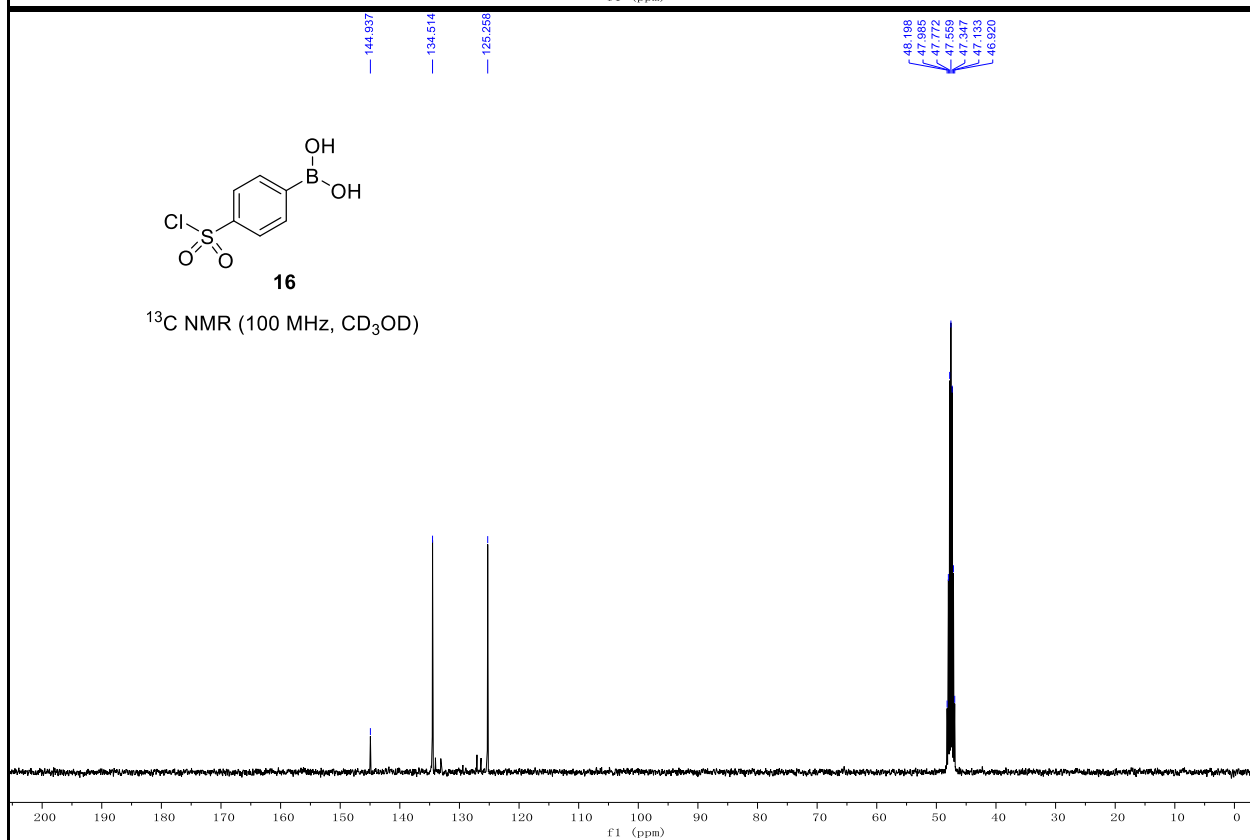

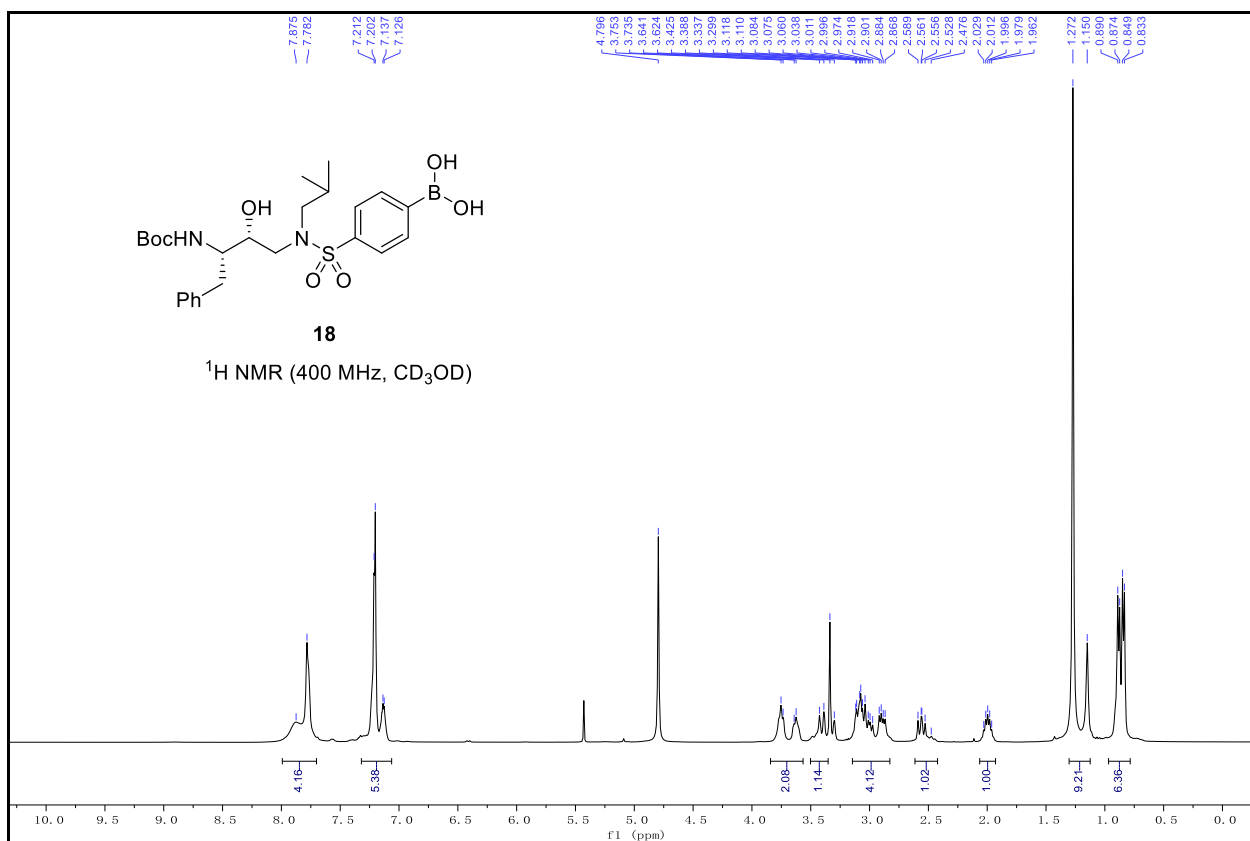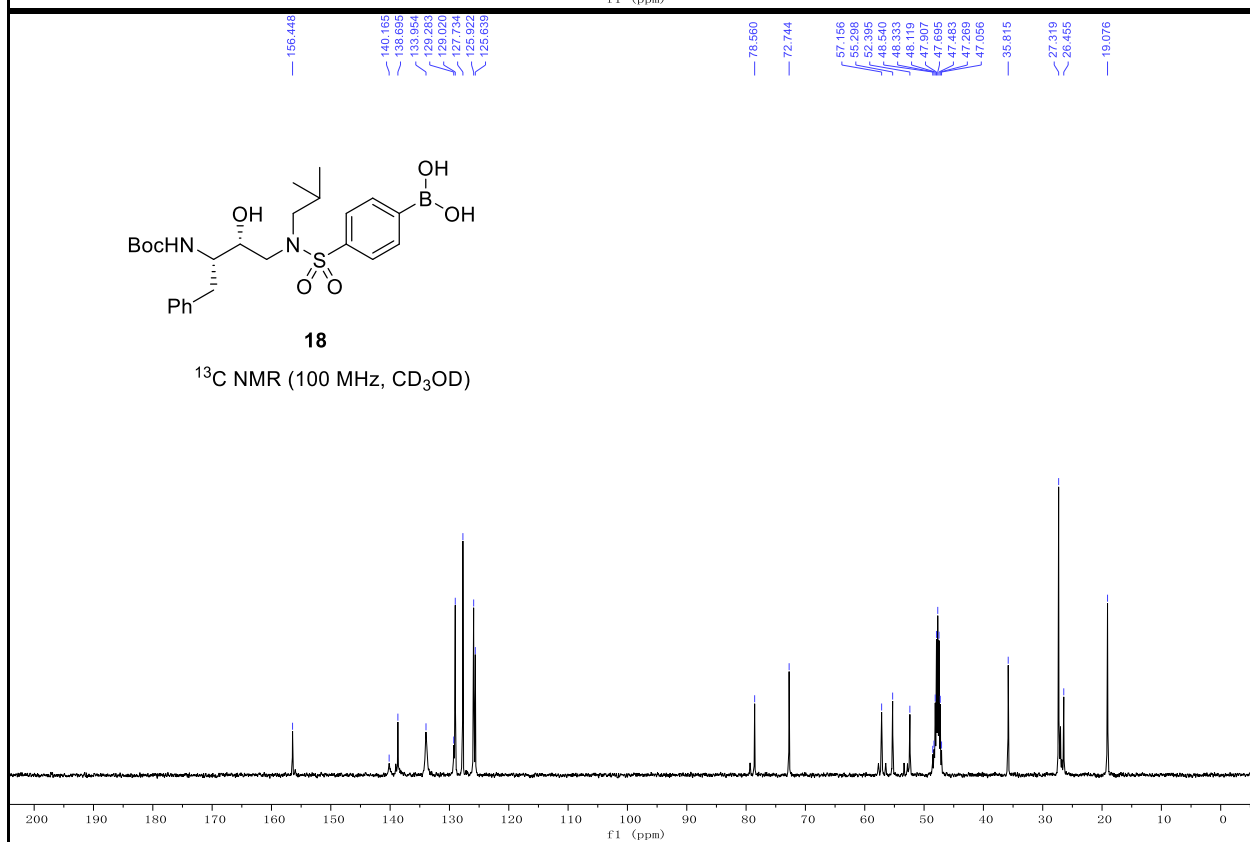

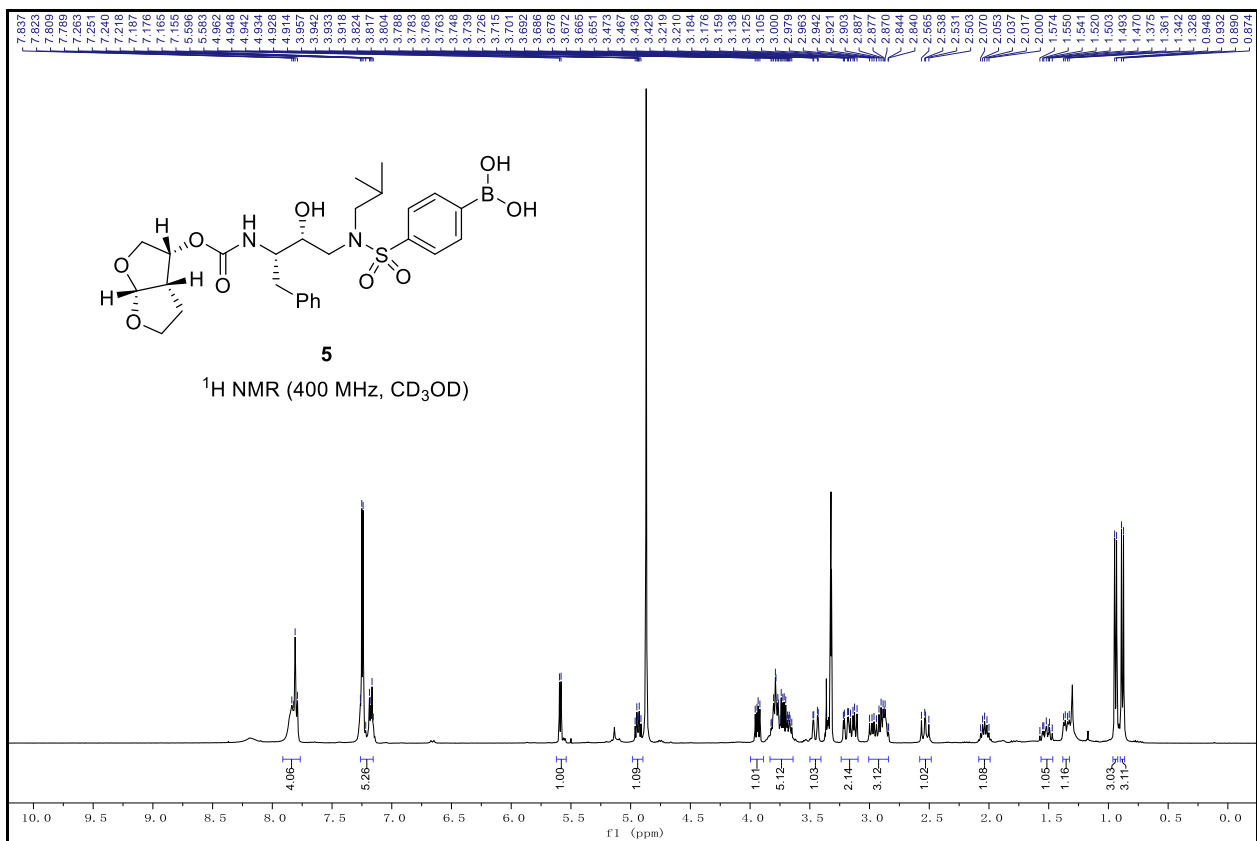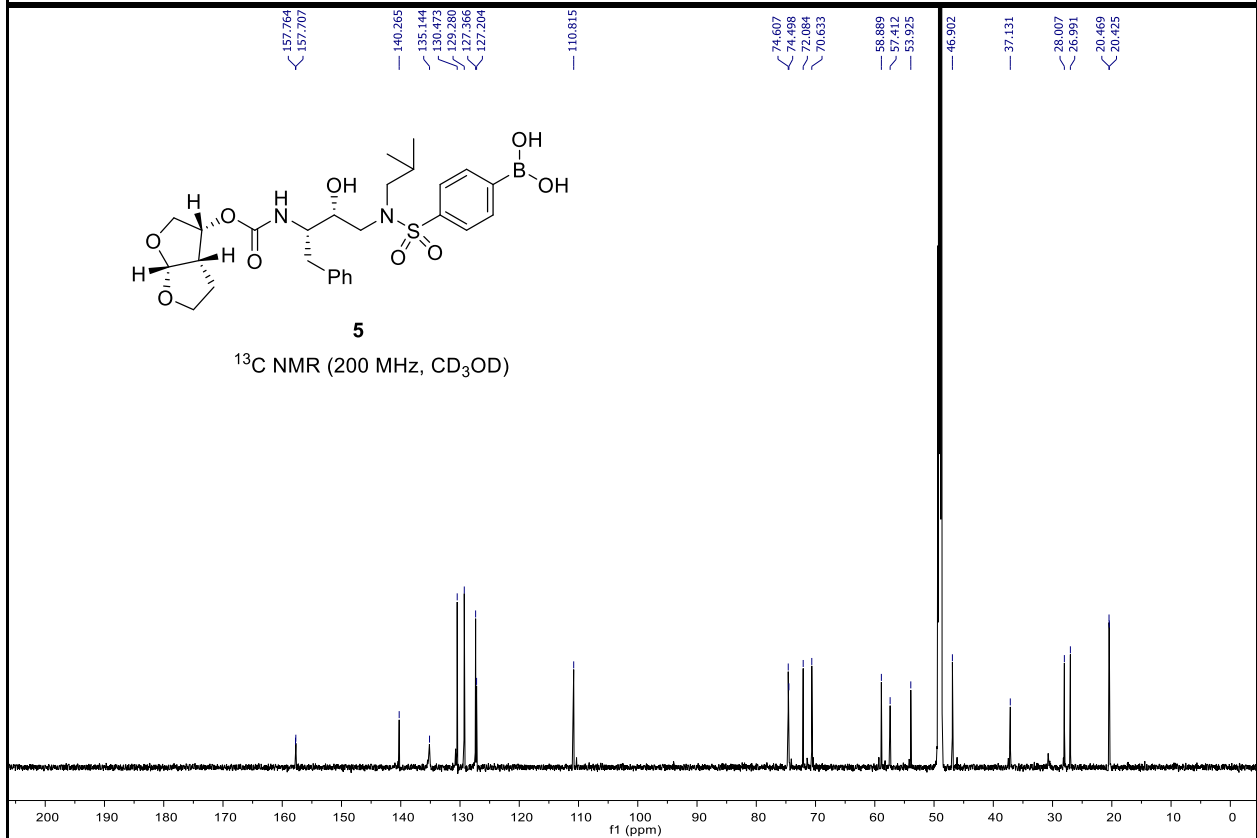



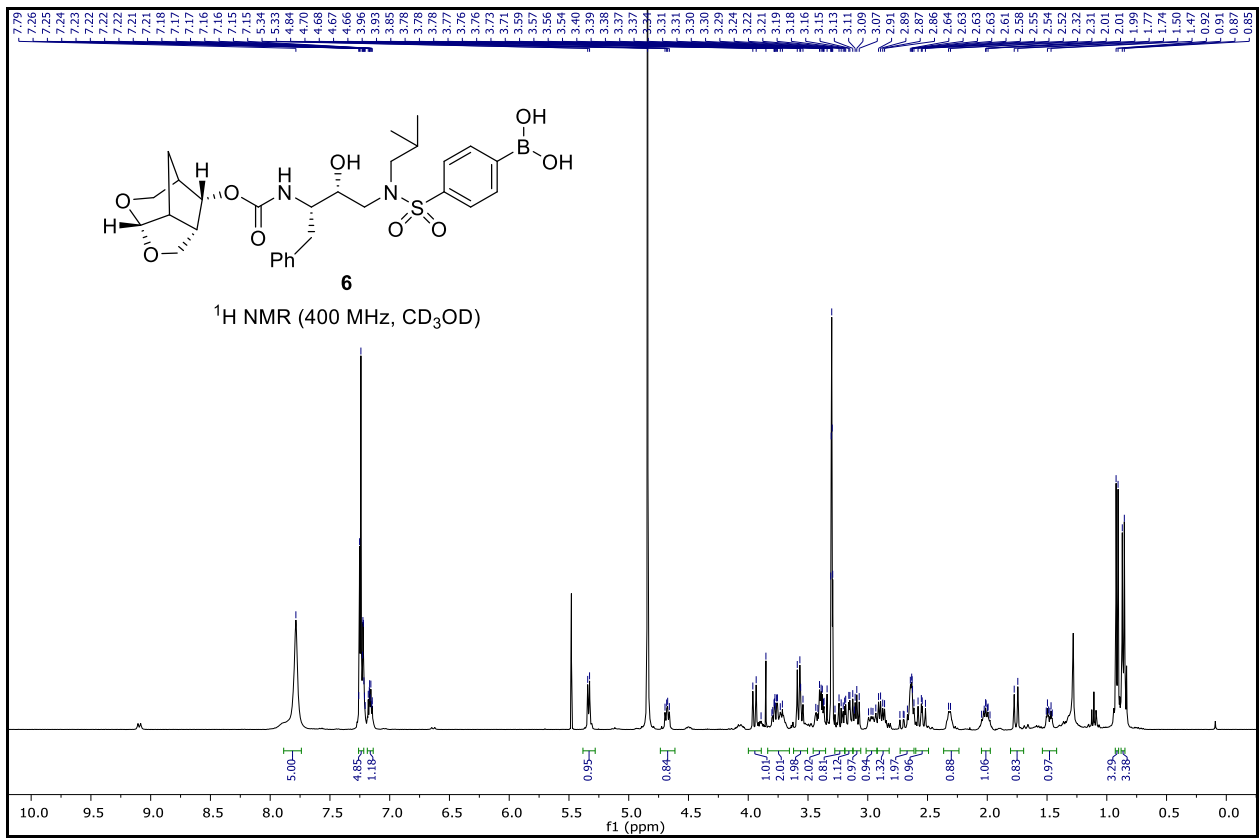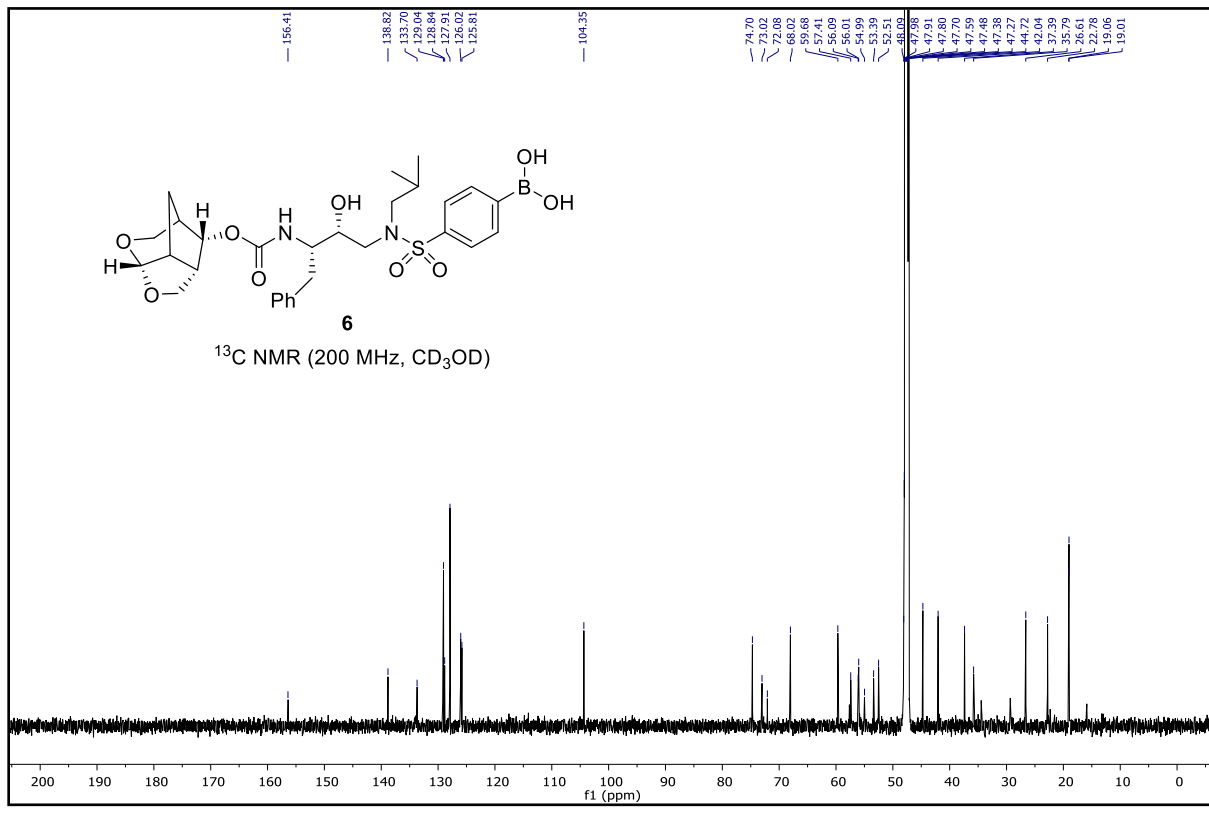

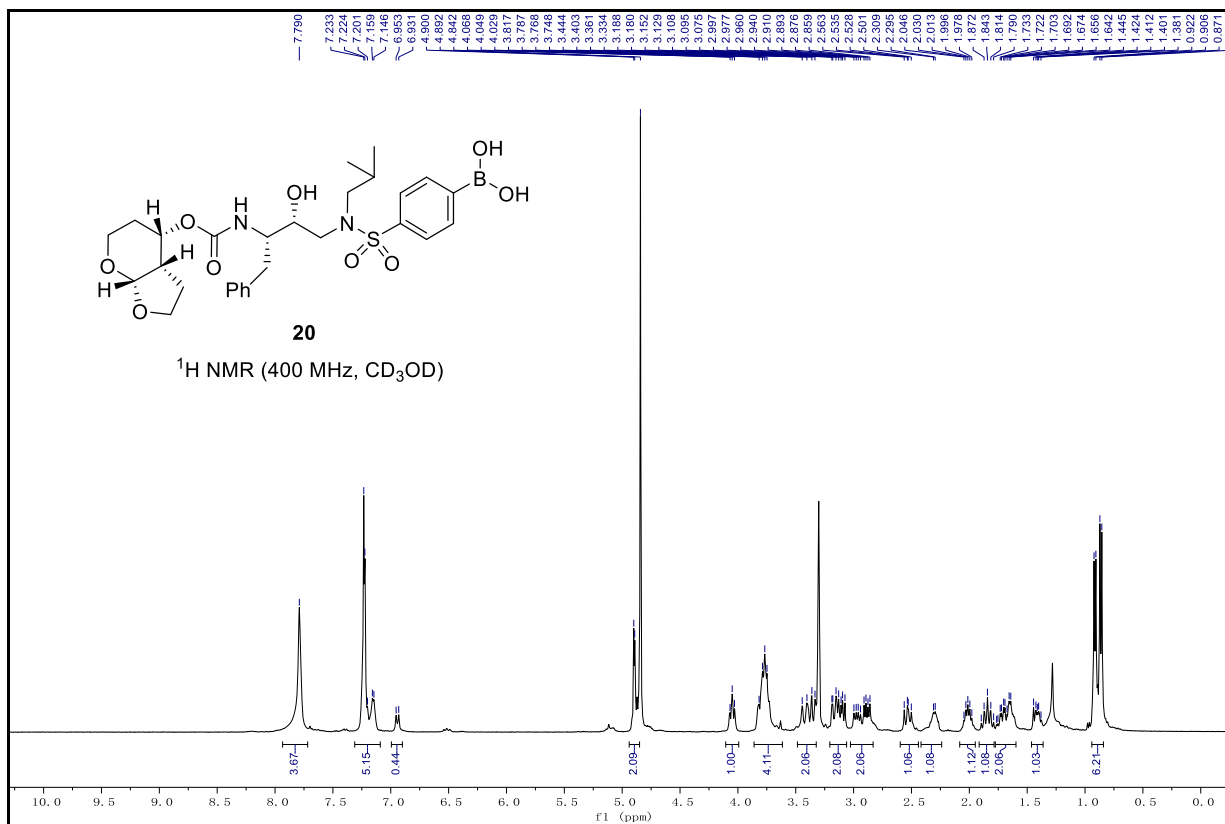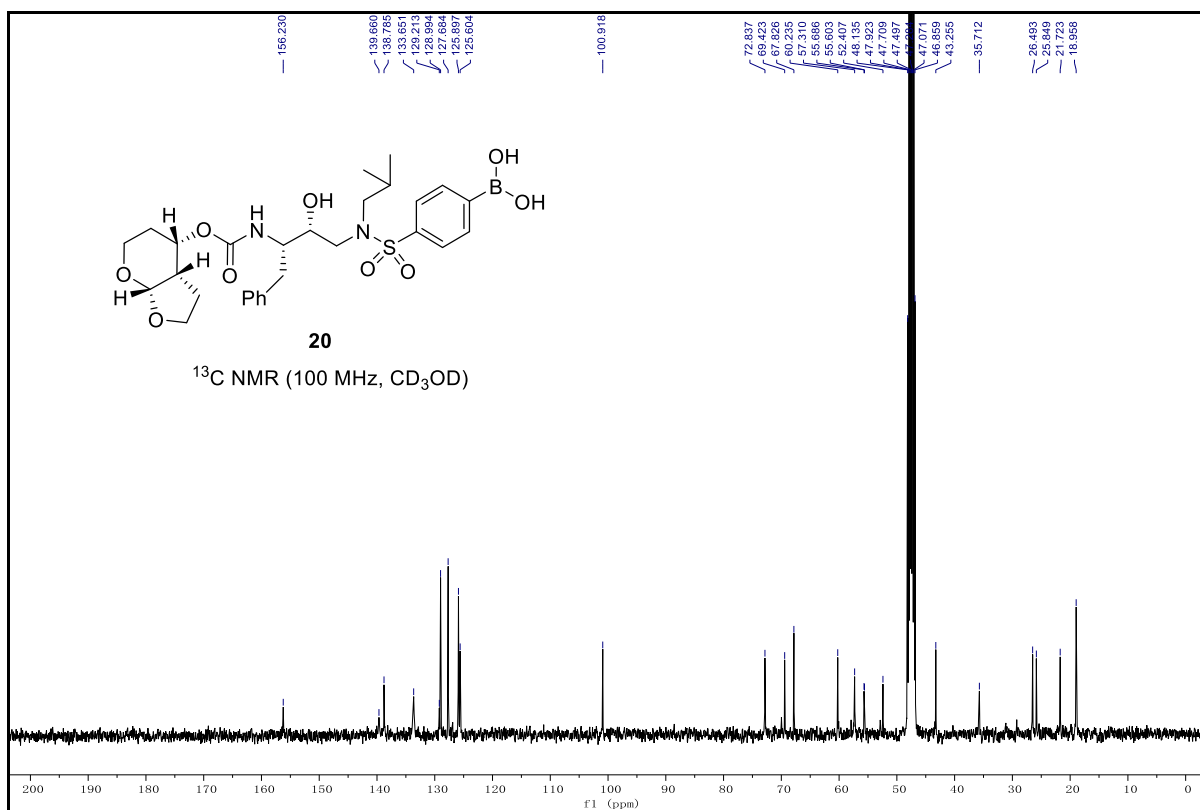

Table 1: Crystallographic Data Collection and Refinement Statistics

| Complex Name                                 | <b>6</b> (GRL-008-19A)           | <b>20</b> (GRL-031-19A)          |
|----------------------------------------------|----------------------------------|----------------------------------|
| Space group                                  | P2 <sub>1</sub> 2 <sub>1</sub> 2 | P2 <sub>1</sub> 2 <sub>1</sub> 2 |
| Unit cell dimensions: (Å)                    |                                  |                                  |
| a                                            | 58.92                            | 58.49                            |
| b                                            | 86.48                            | 86.10                            |
| c                                            | 45.88                            | 46.09                            |
| Resolution range (Å)                         | 50-1.33 (1.38-1.33)              | 50-1.13 (1.17-1.13)              |
| Redundancy (final shell)                     | 6.0 (4.3)                        | 5.7 (2.0)                        |
| Unique reflections                           | 53993 (5048)                     | 79649 (4384)                     |
| Completeness (%) overall (final shell)       | 98.9 (94.1)                      | 90.8 (50.7)                      |
| R <sub>merge</sub> (%) overall (final shell) | 6.1 (74.9)                       | 6.1 (44.5)                       |
| I/σ(I) overall (final shell)                 | 22.6 (2.0)                       | 23.5 (2.0)                       |
| R (%)                                        | 13.7                             | 12.5                             |
| R <sub>free</sub> (%)                        | 17.7                             | 14.1                             |
| RMS deviation from ideality                  |                                  |                                  |
| Bonds (Å)                                    | 0.020                            | 0.025                            |
| Angle distance (Å)                           | 2.3                              | 2.5                              |
| Average B-factors (Å <sup>2</sup> )          |                                  |                                  |
| Wilson Plot B factor                         | 16.5                             | 11.2                             |
| Main-chain atoms                             | 16.1                             | 13.6                             |
| Side-chain atoms                             | 21.8                             | 19.3                             |
| Inhibitor                                    | 11.9                             | 11.9                             |
| Solvent                                      | 26.7                             | 25.0                             |

**Cells, viruses, and antiviral agents.** Human CD4<sup>+</sup> MT-2 cells were grown in RPMI-1640-based culture medium supplemented with 10% fetal calf serum (FCS: JRH Biosciences, Lenexa, MD), 50 unit/mL penicillin, and 100 µg/mL of kanamycin. The following HIV-1 viruses were employed for the drug susceptibility assay (see below): a laboratory HIV-1 strain (HIV-1<sub>LAI</sub>), a clinical HIV-1 strain isolated from drug-naïve patients with AIDS (HIV-1<sub>ERS104pre</sub>) (1), and six HIV-1 clinical isolates which were originally isolated from patients with AIDS, who had received 9 to 11 anti-HIV-1 drugs over the past 32 to 83 months, and were genotypically and phenotypically characterized as multi-PI-resistant HIV-1 variants (1, 2). All such primary HIV-1 strains were passaged once or twice in 3-day old phytohemagglutinin-activated peripheral blood mononuclear cells (PHA-PBM), and the culture supernatants were stored at –80 °C until use. Amprenavir (APV) was received as a gift from Glaxo-Wellcome, Research Triangle Park, NC. Darunavir (DRV) was synthesized as previously described (3).

1. Yoshimura, K., et al. *Proc. Natl. Acad. Sci. USA* **96**, 8675-8680 (1999).
2. Koh, Y., et al. *Antimicrob. Agents Chemother.* **53**, 987-996 (2009).
3. Koh Y, et al *J Mol Biol* **282**, 28709-28720 (2007)
